# Supplementary material for: Upregulation of the ZNF148/PTX3 axis promotes malignant transformation of dendritic cells in glioma stem‐like cells microenvironment
Source: PubMed Central journal article supplement (PMC10401131; doi:10.1111/cns.14213), 2023-04-17

**A** Original full unedited WB gel/blot for ZNF148 expression in Figure 3G, 4B, 6A

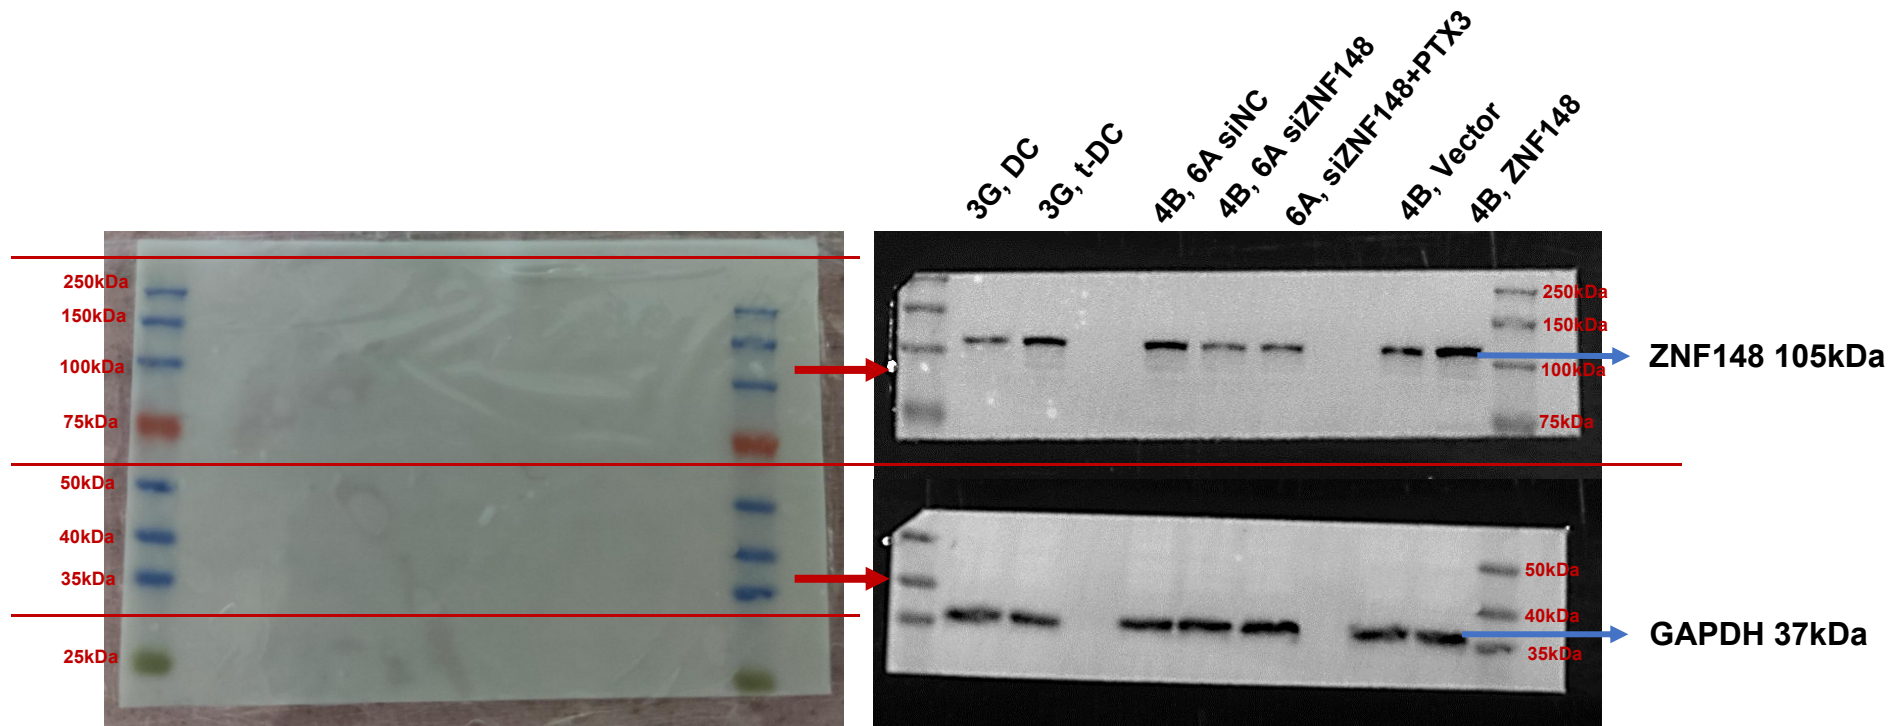

**B** Formal Figure 3G, 4B, 6A in the manuscript

Figure 3G:

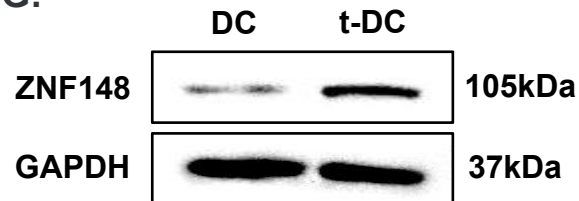

Figure 6A:

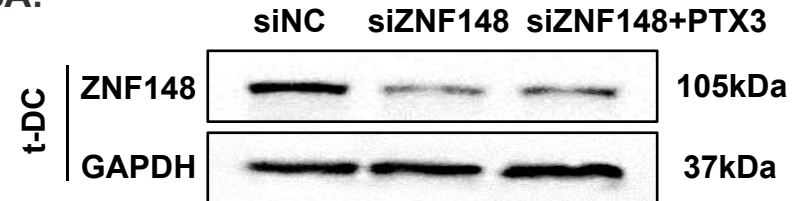

Figure 4B:

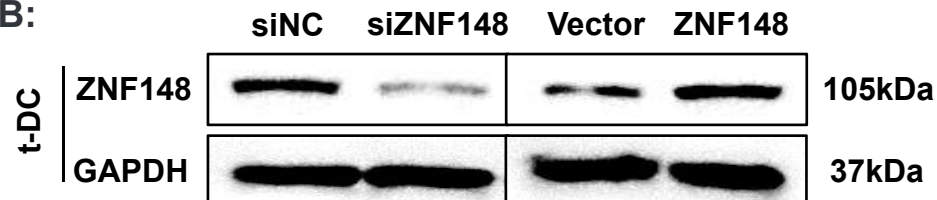

**A** Original full unedited WB gel/blot for PTX3 expression in Figure 3G, 8B

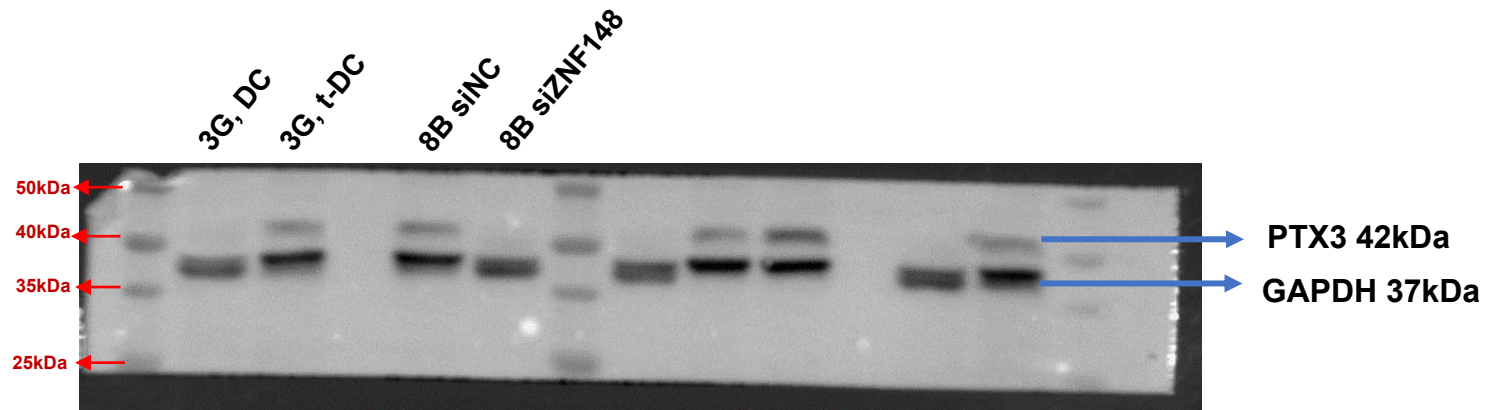

**B** Formal Figure 3G, 8B in the manuscript

Figure 3G:

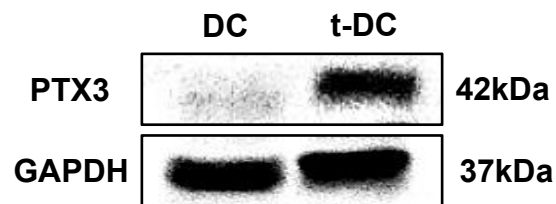

Figure 8B:

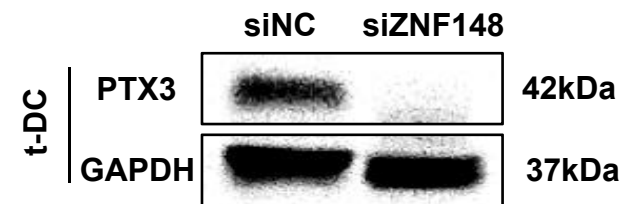

**A** Original full unedited WB gel/blot for PTX3 expression in Figure 6A

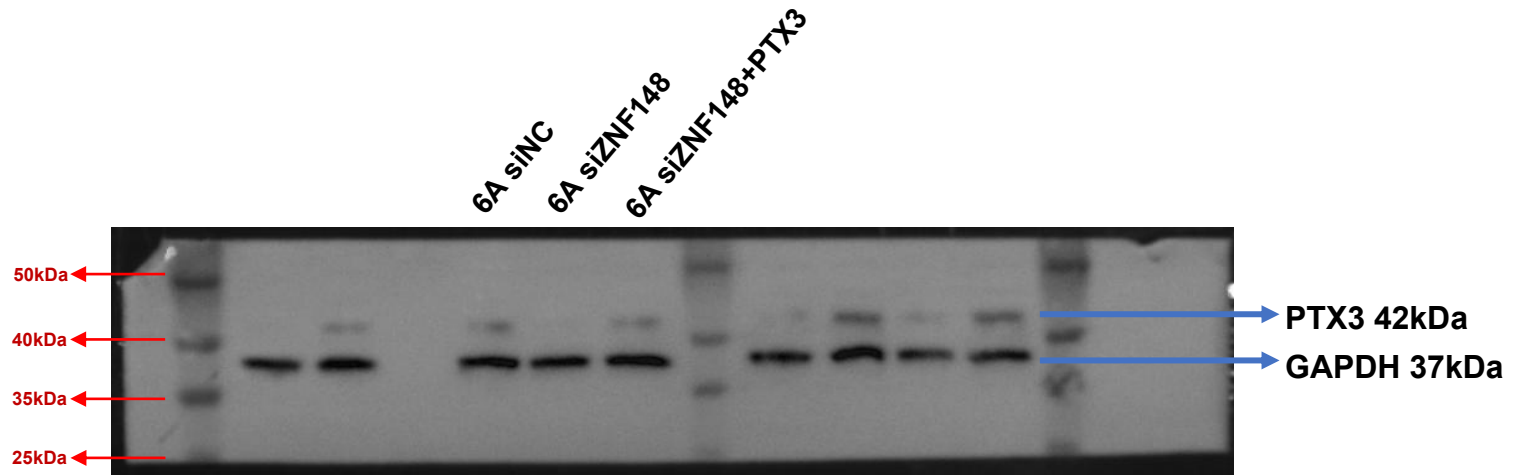

**B** Formal Figure 6A in the manuscript

Figure 6A:

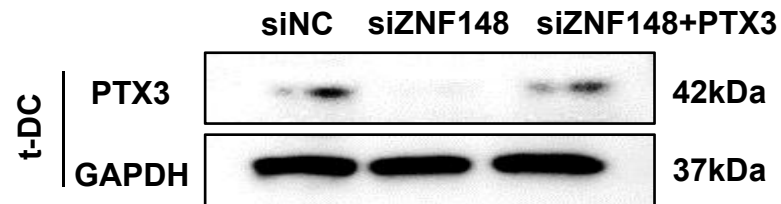

**A** Original full unedited WB gel/blot for PTX3 expression in Figure 5B, 8B

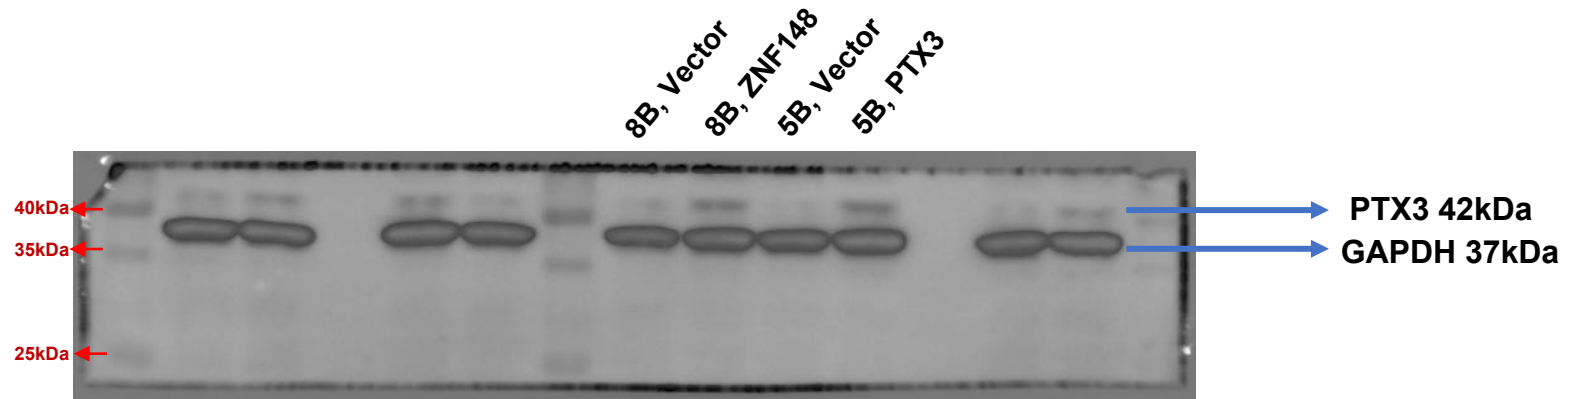

**B** Formal Figure 5B, 8B in the manuscript

Figure 5B:

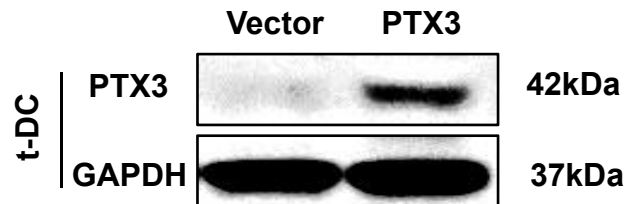

Figure 8B:

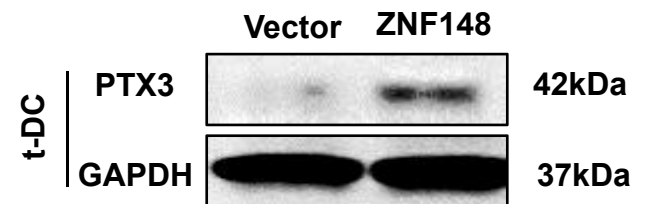

Supplement: CNS-29-2690-s001.pdf [file CNS-29-2690-s001.pdf]
