# Supplementary material for: Upregulation of the ZNF148/PTX3 axis promotes malignant transformation of dendritic cells in glioma stem‐like cells microenvironment
Source: PubMed Central journal article supplement (PMC10401131; doi:10.1111/cns.14213), 2023-04-17
Supplement: CNS-29-2690-s002.pdf [file CNS-29-2690-s002.pdf]

**A**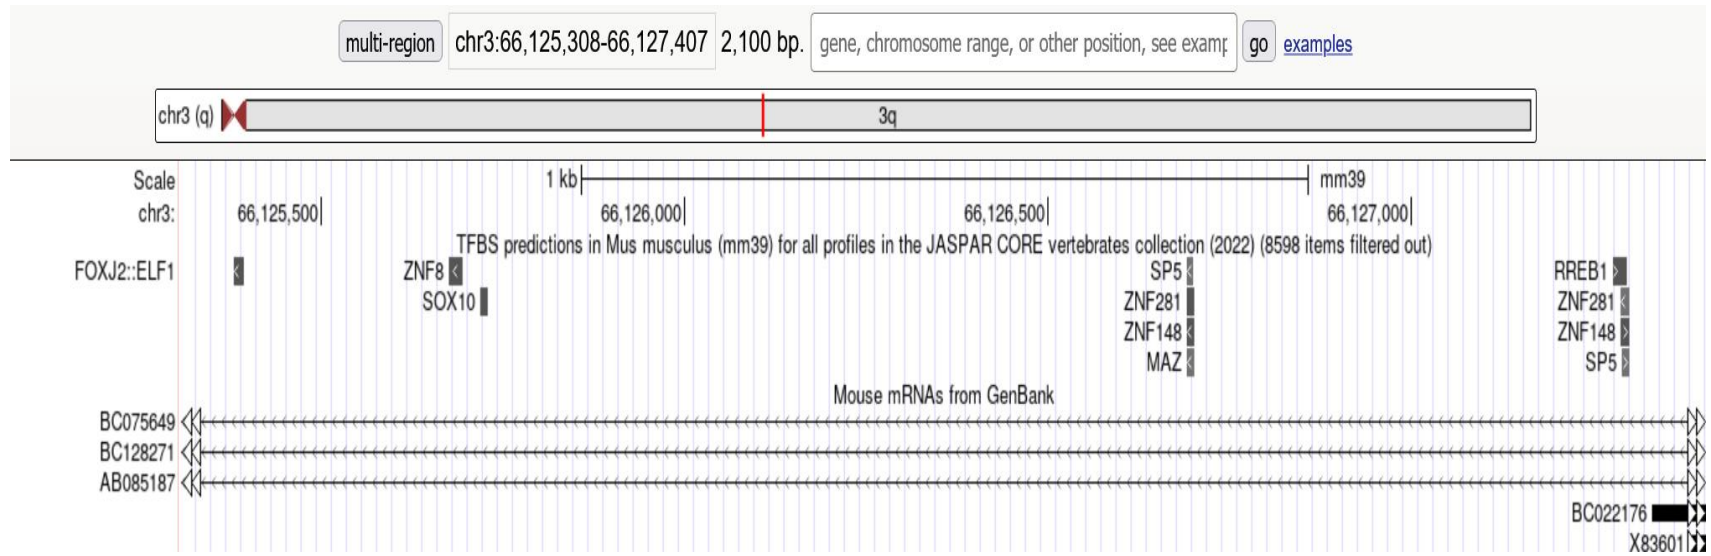**B**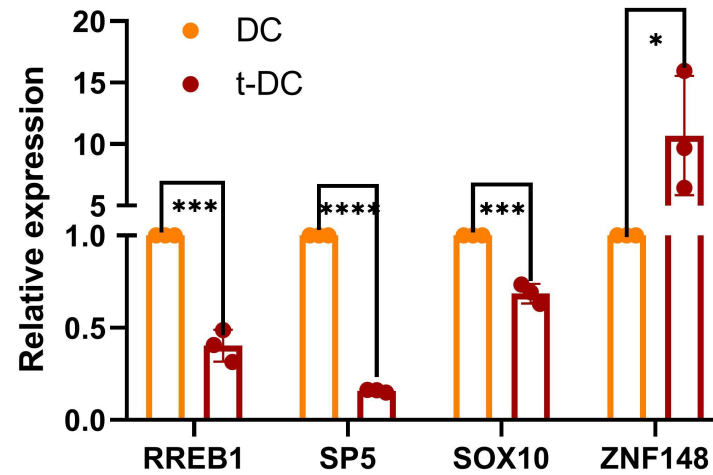

**Figure S1** Expression of ZNF148 in t-DCs
